# Supplementary material
Source: PubMed Central journal article supplement (PMC6352495)
Supplement: Supp_Table1.pdf [file Supp_Table1.pdf]

## Supplementary Data

SUPPLEMENTARY TABLE S1. PROPORTIONS OF RESPONDENTS IN WAVE IV OF THE NATIONAL LONGITUDINAL STUDY OF ADOLESCENT TO ADULT HEALTH (2008), CATEGORIZED AS HAVING HIGH-RISK LEVELS OF BIOMARKERS, METABOLIC SYNDROME, AND ECONOMIC STRAIN, BY GENDER AND SEXUAL ORIENTATION IDENTITY

|                                     | <i>100%<br/>heterosexual<br/>N (%)</i> | <i>Mostly<br/>heterosexual<br/>N (%)</i> | <i>Bisexual<br/>N (%)</i> | <i>Mostly<br/>homosexual<br/>N (%)</i> | <i>100%<br/>homosexual<br/>N (%)</i> | p                |
|-------------------------------------|----------------------------------------|------------------------------------------|---------------------------|----------------------------------------|--------------------------------------|------------------|
| <b>Males (n = 5230)</b>             |                                        |                                          |                           |                                        |                                      |                  |
| Total                               | <b>4875 (93.4)</b>                     | <b>181 (3.6)</b>                         | <b>33 (0.6)</b>           | <b>44 (0.6)</b>                        | <b>97 (1.7)</b>                      |                  |
| <b>High-risk biomarkers</b>         |                                        |                                          |                           |                                        |                                      |                  |
| Blood pressure                      | 2213 (46.1)                            | 85 (50.3)                                | 13 (42.8)                 | 28 (59.9)                              | 58.2 (50)                            | 0.334            |
| Waist circumference                 | <b>1723 (36.3)</b>                     | <b>58 (23.7)</b>                         | <b>14 (44.5)</b>          | <b>16 (43.5)</b>                       | <b>22 (24.6)</b>                     | <b>0.033</b>     |
| HbA1c                               | <b>1396 (26.8)</b>                     | <b>44 (22.1)</b>                         | <b>8 (19.9)</b>           | <b>18 (40.9)</b>                       | <b>19 (9.6)</b>                      | <b>0.024</b>     |
| Triglycerides                       | 1884 (39.1)                            | 63 (33.3)                                | 14 (41.3)                 | 13 (21.0)                              | 32 (34.7)                            | 0.333            |
| HDL                                 | 1268 (25.7)                            | 46 (23.7)                                | 10 (22.7)                 | 14 (23.7)                              | 19 (18.3)                            | 0.736            |
| MetS (≥3 high-risk biomarkers)      | 1286 (26.0)                            | 43 (21.4)                                | 9 (27.2)                  | 15 (28.8)                              | 20 (17.2)                            | 0.529            |
| <b>Instances of economic strain</b> |                                        |                                          |                           |                                        |                                      |                  |
| 0                                   | <b>3930 (79.7)</b>                     | <b>130 (66.4)</b>                        | <b>20 (58.9)</b>          | <b>34 (71.1)</b>                       | <b>83.0<sup>a</sup></b>              | <b>0.006</b>     |
| 1                                   | <b>491 (10.3)</b>                      | <b>30 (21.8)</b>                         | <b>49 (12.4)</b>          | <b>6 (19.5)</b>                        | <b>13.0</b>                          |                  |
| 2+                                  | <b>454 (10.1)</b>                      | <b>21 (11.8)</b>                         | <b>9 (28.7)</b>           | <b>4 (9.5)</b>                         | <b>3.9</b>                           |                  |
| <b>Females (n = 6345)</b>           |                                        |                                          |                           |                                        |                                      |                  |
| Total                               | <b>5056 (79.6)</b>                     | <b>1019 (16.3)</b>                       | <b>148 (2.3)</b>          | <b>53 (0.8)</b>                        | <b>69 (1.0)</b>                      |                  |
| <b>High-risk biomarkers</b>         |                                        |                                          |                           |                                        |                                      |                  |
| Blood pressure                      | 1145 (23.2)                            | 218 (21.7)                               | 31 (18.3)                 | 14 (18.0)                              | 17 (27.0)                            | 0.696            |
| Waist circumference                 | 3249 (64.4)                            | 620 (59.0)                               | 105 (66.0)                | 34 (70.8)                              | 45 (70.8)                            | 0.141            |
| HbA1c                               | 1058 (18.3)                            | 185 (14.3)                               | 35 (19.3)                 | 11 (22.6)                              | 8 (11.8)                             | 0.207            |
| Triglycerides                       | 703 (14.2)                             | 161 (15.7)                               | 24 (16.0)                 | 5 (8.9)                                | 7 (9.5)                              | 0.591            |
| HDL                                 | 1173 (24.4)                            | 253 (24.9)                               | 36 (24.2)                 | 14 (24.4)                              | 15 (29.9)                            | 0.951            |
| MetS (≥3 high-risk biomarkers)      | 858 (16.4)                             | 166 (13.7)                               | 32 (15.1)                 | 13 (16.4)                              | 12 (21.4)                            | 0.432            |
| <b>Instances of economic strain</b> |                                        |                                          |                           |                                        |                                      |                  |
| 0                                   | <b>3844 (75.2)</b>                     | <b>673 (66.3)</b>                        | <b>74 (47.4)</b>          | <b>39 (69.9)</b>                       | <b>47 (73.7)</b>                     | <b>&lt;0.001</b> |
| 1                                   | <b>613 (12.6)</b>                      | <b>145 (14.3)</b>                        | <b>29 (22.1)</b>          | <b>7 (12.0)</b>                        | <b>14 (19.4)</b>                     |                  |
| 2+                                  | <b>599 (12.2)</b>                      | <b>201 (19.5)</b>                        | <b>45 (30.6)</b>          | <b>7 (18.1)</b>                        | <b>8 (7.0)</b>                       |                  |

Boldface indicates statistically significant ( $p < 0.05$ ) within-gender association between sexual orientation and each variable, using Pearson's chi-squared tests of association. All proportions in the table are weighted to reflect Add Health sampling weights/complex survey design; all Ns are unweighted counts.

<sup>a</sup>N not reported for economic strain among 100% homosexual-identifying male respondents due to cell sizes being smaller than allowed by Add Health reporting guidelines.

HbA1c, hemoglobin A1c; HDL, high-density lipoprotein; MetS, metabolic syndrome.
