# Supplementary material
Source: PubMed Central journal article supplement (PMC6352495)
Supplement: Supp_Table2.pdf [file Supp_Table2.pdf]

SUPPLEMENTARY TABLE S2. CRUDE AND ADJUSTED ODDS OF METABOLIC SYNDROME IN WAVE IV OF THE NATIONAL LONGITUDINAL STUDY OF ADOLESCENT TO ADULT HEALTH (2008), BY GENDER AND SEXUAL ORIENTATION IDENTITY

|                              | <i>Model 1</i><br><i>OR (95% CI)</i> | <i>Model 2</i><br><i>aOR (95% CI)</i> | <i>Model 3</i><br><i>aOR (95% CI)</i> | <i>Model 4</i><br><i>aOR (95% CI)</i> | <i>Model 5</i><br><i>aOR (95% CI)</i> |
|------------------------------|--------------------------------------|---------------------------------------|---------------------------------------|---------------------------------------|---------------------------------------|
| <b>Males</b>                 |                                      |                                       |                                       |                                       |                                       |
| Sexual orientation           |                                      |                                       |                                       |                                       |                                       |
| 100% heterosexual            | 1.00                                 | 1.00                                  | 1.00                                  | 1.00                                  | 1.00                                  |
| Mostly heterosexual          | 0.77 (0.47–1.29)                     | 1.11 (0.57–2.17)                      |                                       | 1.15 (0.59–2.25)                      | 1.21 (0.63–2.36)                      |
| Bisexual                     | 1.06 (0.36–3.13)                     | 1.06 (0.30–3.78)                      |                                       | 1.00 (0.27–3.72)                      | 1.02 (0.28–3.75)                      |
| Mostly homosexual            | 1.15 (0.49–2.70)                     | 1.42 (0.53–3.82)                      |                                       | 1.47 (0.55–3.94)                      | 1.57 (0.58–4.30)                      |
| 100% homosexual              | 0.59 (0.27–1.29)                     | 0.73 (0.34–1.56)                      |                                       | 0.74 (0.35–1.54)                      | 0.78 (0.37–1.62)                      |
| Instances of economic strain |                                      |                                       |                                       |                                       |                                       |
| 0                            |                                      |                                       | 1.00                                  | 1.00                                  | 1.00                                  |
| 1                            |                                      |                                       | 0.79 (0.57–1.08)                      | 0.78 (0.57–1.07)                      | 0.75 (0.54–1.04)                      |
| 2+                           |                                      |                                       | 1.21 (0.87–1.69)                      | 1.21 (0.87–1.69)                      | 1.14 (0.82–1.59)                      |
| <b>Females</b>               |                                      |                                       |                                       |                                       |                                       |
| Sexual orientation           |                                      |                                       |                                       |                                       |                                       |
| 100% heterosexual            | 1.00                                 | 1.00                                  | 1.00                                  | 1.00                                  | 1.00                                  |
| Mostly heterosexual          | 0.81 (0.62–1.05)                     | 0.83 (0.62–1.11)                      |                                       | 0.83 (0.62–1.12)                      | 0.86 (0.64–1.16)                      |
| Bisexual                     | 0.90 (0.53–1.54)                     | 0.86 (0.50–1.50)                      |                                       | 0.88 (0.51–1.53)                      | 0.84 (0.49–1.44)                      |
| Mostly homosexual            | 0.99 (0.39–2.52)                     | 1.03 (0.33–3.23)                      |                                       | 1.04 (0.33–3.29)                      | 0.99 (0.29–3.36)                      |
| 100% homosexual              | 1.38 (0.61–3.15)                     | 1.23 (0.49–3.08)                      |                                       | 1.22 (0.49–3.04)                      | 1.22 (0.48–3.10)                      |
| Instances of economic strain |                                      |                                       |                                       |                                       |                                       |
| 0                            |                                      |                                       | 1.00                                  | 1.00                                  | 1.00                                  |
| 1                            |                                      |                                       | 1.03 (0.76–1.38)                      | 1.03 (0.77–1.39)                      | 0.97 (0.72–1.30)                      |
| 2+                           |                                      |                                       | 0.88 (0.68–1.14)                      | 0.90 (0.69–1.16)                      | 0.82 (0.62–1.08)                      |

MetS was defined as meeting high-risk cut point criteria for  $\geq 3$  of the following biomarkers: blood pressure (systolic blood pressure  $\geq 135$  and/or diastolic blood pressure  $\geq 85$ ); waist circumference ( $>88$  cm [female]/  $>102$  cm [Male]); HbA1c ( $>5.7\%$ ); triglycerides ( $\geq 2$  [female] or  $\geq 3$  [male] deciles); and HDL ( $\leq 3$  [female] or  $\leq 2$  [male] deciles). Model 1 reflects the crude association between sexual orientation and metabolic syndrome. Model 2 reflects the association between sexual orientation and metabolic syndrome adjusting for demographics (age, race/ethnicity, and nativity) and biomarker-associated controls (physical activity, BMI, substance use, and medication use). Model 3 reflects the association between economic strain and metabolic syndrome adjusting for demographics (age, race/ethnicity, and nativity) and biomarker-associated controls (physical activity, BMI, substance use, and medication use). Model 4 contains all variables in Model 3 with additional adjustment for sexual orientation. Model 5 contains all variables in Model 4 with additional adjustment for current socioeconomic status (income, respondent educational attainment, and pre-18 public assistance).

\* $p < 0.05$ ; \*\* $p < 0.01$ ; \*\*\* $p < 0.001$ .

CI, confidence interval; OR, odds ratio; aOR, adjusted odds ratio; BMI, body mass index.
